# Supplementary material for: Deciphering the Regulatory Circuits of RA3 Replication Module - Mechanisms of the Copy Number Control
Source: MDPI journal article supplement (doi:10.3390/ijms23179964), 2022-09-01
Supplement: s1 [file s1]

# Fragment 45361-45500:

<sup>#1</sup>  
 CAGGGCGGGCCTGATCTAT**TTGTTGAAGTT**TACCAACTAGGT**TACACTTCAAAAC**CATCAT  
 GTCCCGCCCGGACTAGATAACAACCTTCAAATGGTTGATCCAATGTGAAGTTTTGTGTAGTA

<sup>#6</sup>  
 TCTGATGAGGGCTTATTAC**ATGA**ACCAATCACGACCGGCCACACCTGGCCAGATACTTGAA  
 AGACTACTCCCGAATAATGTACTTGGTTAGTGCTGGCCGGTGTGGACCGGTCTATGAACTT

EcoRI  
 AGGGAATTCTTGGCCCCG  
 TCCCTTAAGAACCGGGGC  
 r e f l a p

**Figure S6.** DNA sequence of the *repA* promoter region

The -35 and -10 motifs of *repAp* are bolded. The rbs site of *repAm*RNA is underlined and the N-terminal sequence of RepA is shown. The arms of two palindromic sequences, IR1 and IR2, are labelled in green (operator O<sub>RepA</sub>) and in gray (unknown function), respectively. Lowercase letters above the DNA sequence indicate substitutions in IR1\* (6 nt) and IR2\* (5 nt), introduced to diminish the reverse complementarity of IR1 or IR2 motifs. Restriction site EcoRI (italics) and primers used for PCR amplification are indicated.
