# Supplementary material for: Deciphering the Regulatory Circuits of RA3 Replication Module - Mechanisms of the Copy Number Control
Source: MDPI journal article supplement (doi:10.3390/ijms23179964), 2022-09-01
Supplement: s1 [file s1]

**A**

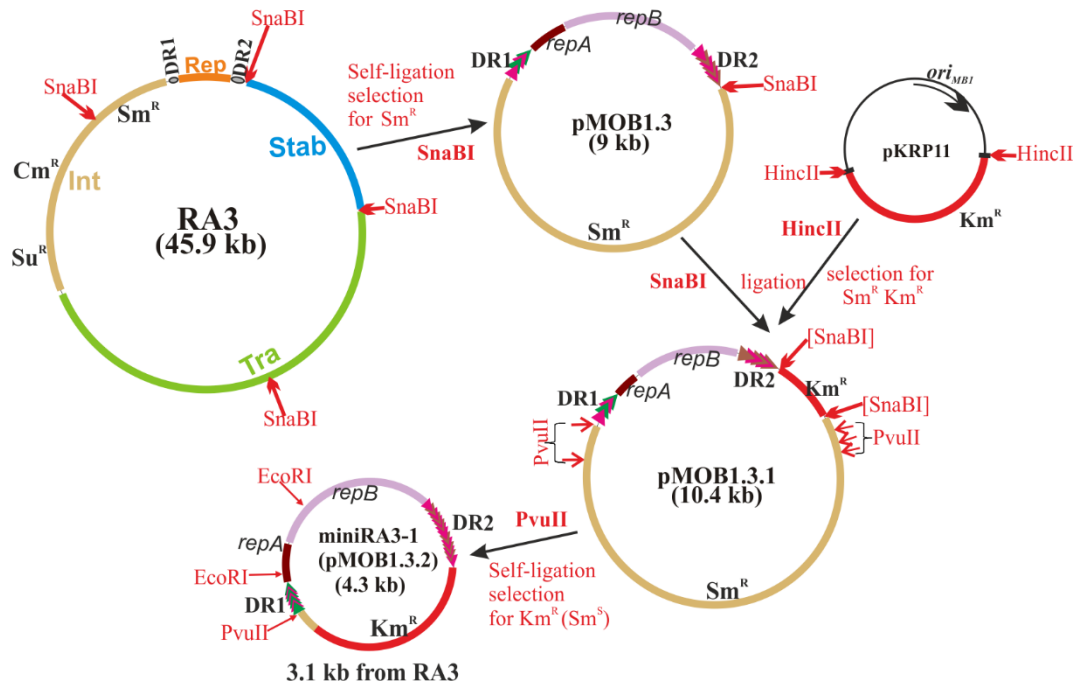

**B**

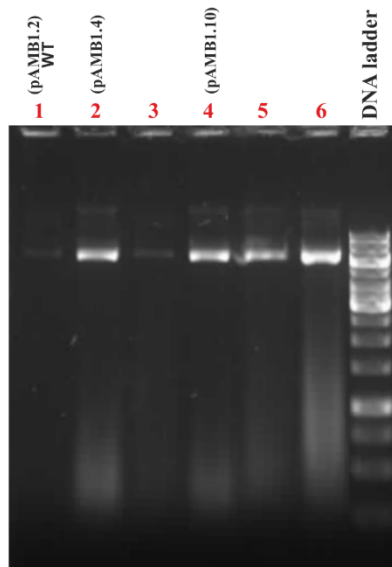

**Figure S3.** RA3 minireplicons construction

(A) The restriction sites used in subsequent steps of construction are indicated. The identified elements of replication module as well as the resistance cassettes are shown. (B) Plasmid DNAs isolated from the *E. coli* *Sm<sup>R</sup>* colonies obtained after transformation with RA3 plasmid *SnaBI* digested and then self-ligated. Plasmid numbers refer to the isolates that have been further analyzed by sequencing.
