# Supplementary material for: Deciphering the Regulatory Circuits of RA3 Replication Module - Mechanisms of the Copy Number Control
Source: MDPI journal article supplement (doi:10.3390/ijms23179964), 2022-09-01
Supplement: s1 [file s1]

|           |                                                                                                              |     |
|-----------|--------------------------------------------------------------------------------------------------------------|-----|
| RA3       | MAQ-AQLSLFGQ-NEAETVHDTSGARGFSSLLVQWP--TGKROSSFPLEQMPTVLINAVDHRIDTWLSQAEFMRPNRRVVNLIRIGLLFADLDITYKMPWAQGRKPEE | 101 |
| Rms149    | MGQ-AQLRLFSPADEAGCYHDTARQGFFSLLMATGEGSGKKQDSYRLSQMPVVLMLDHSRDTWLSQAEFIKPNRRVVNLARIGLLFADLDITYREPWAQGRSPEQ    | 104 |
| Plasmid2  | MAADQQLSLFDRDEEARAYHDPQAGFFSILVNAK--GDKRQSSHRLIDMPTVLGLIDKNRDTWMTQAEFIRPNRRVVNLARVGLLFADLDITYKPPWASGRTPEQ    | 103 |
| pAMTVIM-7 | MAGQAQLALFEPADDEAGTYHDTARTGFFSLLVAVG--KDKRQDSYRLTDMPTILGLMVDQTRDTWLTQAEFMRPNRRVVNLARVGLLFADLDITYKPPWATGRTPEQ | 103 |
| pRSB105   | MGQ-AQLRLFSPADEAGCYHDTARQGFFSLLMATGEGSGKKQDSYRLSQMPVVLMLDHSRDTWLSQAEFIKPNRRVVNLARIGLLFADLDITYREPWAQGRSPEQ    | 104 |
| pRIO-5    | MGQ-AQLRLFSPADEAGCYHDTARQGFFSLLMATGEGSGKKQDSYRLSQMPVVLMLDHSRDTWLSQAEFIKPNRRVVNLARIGLLFADLDITYREPWAQGRSPEQ    | 104 |
| pAb5S9    | MAAVEQLSLFDRDEEARAYHDPQAGFFSILVDVN--GDKRQSSHRLIEMPTVLELIDKSRDTWLTQAEFIRPNRRVVNLARVGLLFADLDITYKPPWAKGRTPEQ    | 103 |
| pKBB4037  | MAAVAQSLSLFDRDEEARAYHDPQSGFFSILVDVH--GDKRQSSHRLIEMPTVLELIDKTRDTWLTQAEFIRPNRRVVNLARIGLMFADLDITYKPPWATGRTPEQ   | 103 |
| RA3       | LAAAITTFVQSEGIPOPSIMVYSGRGIQAKWLLERPVPQALPRWNACQTHLINKLAELGADPAKADASRVLRVNTVNSKSGAVCRVVHVEE-GGLPIRYNFE       | 205 |
| Rms149    | LAAAVMFRFYDEGVPPPSILVFSGRGVQAKWLLDGTLPQALPRWNACQRYLIDRLAGLGADPAKADASRVLRVNTVNSKSGEVCRVHVEQGPDGEPYRYNFE       | 209 |
| Plasmid2  | LVDSVLYHCTQEGIPPPSILVFSGRGIQAKWLLDGTLPQALPRWNACQRYLIDRLAYLGADPAKADASRVLRVNTVNEKSGEICRVVHVQNEINQGPVRYNFE      | 208 |
| pAMTVIM-7 | LAAITVLYHCAQEGIPTFSLIVYSGRGIQAKWLLDGTLPQALPRWNACQRYLIDRLAGLGADPAKADASRVLRVNTVNTKSGDVCRVVHVEHQDQGPVRYGFE      | 208 |
| pRSB105   | LAAAVMFRFYDEGVPPPSILVFSGRGVQAKWLLDGTLPQALPRWNACQRYLIDRLAGLGADPAKADASRVLRVNTVNSKSGEVCRVHVEQGPDGEPYRYNFE       | 209 |
| pRIO-5    | LAAAVMFRFYDEGVPPPSILVFSGRGVQAKWLLDGTLPQALPRWNACQRYLIDRLAGLGADPAKADASRVLRVNTVNSKSGEVCRVHVEQGPDGEPYRYNFE       | 209 |
| pAb5S9    | LAAAVLYHCAQEGIPTFSLIFSGRGIQAKWLLDGTLPQALPRWNACQRYLIDRLRPVGADVAAKADASRVLRVNTVNSKSGEICRVVHVENGPDGPVRYSE        | 208 |
| pKBB4037  | LAAAVLYHCAQEGIPTFSLIFSGRGIQAKWLLDRVPQALPRWNACQRYLIDRLMAIGADVAAKADASRVLRVNTVNTKSGEICRVVHVETGADGPVRYGFE        | 208 |
| RA3       | YLAEMLLPVARWDIE--KQ-KAERQ-QARTIVVNGGKVGNLRTFSGRQLAWDRLEDRLKLGQLRGGINEGERMRHLFWRLNFFLLSGATNSAQMYHEAAALSSSEI   | 306 |
| Rms149    | YLAEALLPVARWDIEADRKARAD---RRQFKLLPGGQGTGNLRTLNGRQLAWDRLEDRLTAAALRGVVAEGERMQHLFWRLNFFLLSGATHGQMYHEAAALAREI    | 311 |
| Plasmid2  | YMAEILLPVARWTIEQQRQERKRAIRRQKLKLLPGDKTDNLRGFSGRQLAWHRLLEDRLTAEALRGGVQEGERMQHLFWRLNFFLLSGATNSRLMYEAKAITKEI    | 313 |
| pAMTVIM-7 | YLAEMLLPVARWDIEQQRDRDAE---RRQKLKLLPGGKADNLRGFSGRQLAWDRLEDRLKLGELRGGVREGERMQHLFWRLNFFLLSGATHSGQMYHEAAALAGEI   | 310 |
| pRSB105   | YLAEALLPVARWDIEADRKARAD---RRQFKLLPGGQGTGNLRTLNGRQLAWDRLEDRLTAAALRGVVAEGERMQHLFWRLNFFLLSGATHGQMYHEAAALAREI    | 311 |
| pRIO-5    | YLAEALLPVARWDIEADRKARAD---RRQFKLLPGGQGTGNLRTLNGRQLAWDRLEDRLTAAALRGVVAEGERMQHLFWRLNFFLLSGATHGQMYHEAAALAREI    | 311 |
| pAb5S9    | YLAEMLLPVARWTIEQQRQERAE---RRQKLKLLSGAKTDNLRGFSGRQLAWHRLLEDRLKATLRGGVSEGERMQHLFWRLNFFLLSGATHSGQMYEAKALAGEI    | 310 |
| pKBB4037  | YLAEMLLPVARWETIEQQRERAEER---RQQLKLLPGTKTDNLRGFSGRQLAWHRLLEDRLKATLRGGVQEGERMQHLFWRLNFFLLSGATHSGQMYHEAKALAREI  | 311 |
| RA3       | DTWVSYSKELMTLYSKAKSYEAGERVEFGGKSFAPLYTPKNDTLINLFIQSQQEQQLKTIISTDEAQKRRERDRRLDEERRRAAGQ---LEREAYEANSLS        | 407 |
| Rms149    | DPRWNYRSAELMTLYAKAKAHEAGEKVEFGGKFAPLYTPKNDTLISLFIHISDDEQKRLRTLISRDMAETERRDRDRKDEARRRAAGA---VDRATYEANSAS      | 412 |
| Plasmid2  | DPNWQENSKELMTLYSKAKAYEAGEKVSFGGREYAPLYTPRNDTLINLFIQITDDEQAQLRTIISRDMAKERDRAR---KEAVVRAAGA---VDRETYESQSLS     | 410 |
| pAMTVIM-7 | DPAWSYSKELMTLYAKAKAYEAGERVTLGGREFAPLYTPKNDTLISLFIQITDDEQKRLRTLISSDMAKERDRER---HTARRRAAGA---VDREYLYDAAEA      | 407 |
| pRSB105   | DPRWNYRSAELMTLYAKAKAHEAGEKVEFGGKFAPLYTPKNDTLISLFIHITDDEQKRLRTLISRDMAAERHSER---EKARRRAAGA---VDRASYLEAASA      | 408 |
| pRIO-5    | DPRWNYRSAELMTLYAKAKAHEAGEKVEFGGKFAPLYTPKNDTLISLFIHITDDEQKRLRTLISRDMAAERHSER---EKARRRAAGA---VDRASYLEAASA      | 408 |
| pAb5S9    | APTWAYRKELMTLYSKAKAYEAGEKISFAGREFAPLYTPKNDTLINLFIQITDDEQAQLRTIISKGMAGKDRAR---KEAARRAAGA---VDRETYLEAANA       | 407 |
| pKBB4037  | APDWOQNSKELMTLYSKAKAYEAGEKITFGGKEYAPLYTPRNDTLINLFIQITDDEQAQLRTIISRDMAAERRSA---TESATRPVGGPLVVRWIGKTYLEAANT    | 412 |
| HTH       |                                                                                                              |     |
| RA3       | RQKPWEAMGSRSAKWYRLGKPSPOQNSSETSPSPITNGEASAPPLQAARCAV-----                                                    | 459 |
| Rms149    | RQKPWESLGMSRASWYRAGKPMPA--CETGSSPITASKVERKA-----                                                             | 453 |
| Plasmid2  | RQKPWEALGMSRASWYRAGKPMPA-NSETSPSVLQKNGRFLV-----                                                              | 452 |
| pAMTVIM-7 | KRAQAQALKAEGLSVRAIAQRMGISKSLAAMYAKEAAECP-----KSVR---ITADQAMPVASIAGSDEGGREGVQSPSVLIMAEPTGRGAV----             | 491 |
| pRSB105   | KQAQALALKAQGLSVRAIAAQMGIKTAAGRYIAEPGECF-----KSMR---ITGGEG-----                                               | 458 |
| pRIO-5    | KQAQALALKAQGLSVRAIAAQMGIKTAAGRYIAEPGECF-----KSMR---ITGGEG-----                                               | 458 |
| pAb5S9    | KQAQAQALRAQGLSIRAIQAQMGSVGSVSGYLKAAPGVQSPSVLQADLAGCSKSVR---ITNGEAHARFVGPAFE-----                             | 480 |
| pKBB4037  | KQAQAQALREQGLSVRAIAAQMGSVGSVSGYLKAGASVQSGSPITGAVMEKSG-VQSPSPTNGEAYARFVGPAFE-----                             | 488 |

**Figure S1.** Comparison of RepB homologs. Residues identical and similar in at least four proteins are shadowed in dark grey or light grey, respectively. The red arrow marks the putative Helix-Turn-Helix motif in RepB of RA3. RA3 (ABD64829); Rms149 of *Pseudomonas aeruginosa* (WP\_011270176); Plasmid 2 of *Nitrosomonas eutropha* (WP\_011630685); pAMTVIM-7 of *P. aeruginosa* (WP\_011997473); pRSB105 (ABI20460); pRIO-5 of *Serratia marcescens* (WP\_015060213); pAb5S9 of *Aeromonas bestiarum* (WP\_011931113); pKBB4037 of *Bordetella bronchiseptica* (CAI47016).
