# Supplementary material for: Deciphering the Regulatory Circuits of RA3 Replication Module - Mechanisms of the Copy Number Control
Source: MDPI journal article supplement (doi:10.3390/ijms23179964), 2022-09-01
Supplement: s1 [file s1]

## Fragment between 1291-1551 nt:

partial r3

CAACAAAACA**GTGAGACAAGTCCCTCCCCTATTAC**TAATGGCGAAGCCTCAGCCCCCCCG  
 GTTGTTTTGTCACTCTGTTTCAGGGAGGGGATAATGATTACCGCTTCGGAGTCGGGGGGGC  
 q q n s e t s p s p i t n g e a s a p p  
 #22 → #64 → AT-rich region  
 CTACAGGCGGCTAGGTGTAAAGCCGTTTAGATGGC**TATTTCAAAGTGAGTGAGATTTTGT**  
 GATGTCCGCCGATCCACATTTTCGGCAAATCTACCG**ATAAAGTTTCACCTCACTCTAAAACA**  
 l q a a r c k a v - #10 #63  
 #66 →  
**AACTGATGGCAGCCCTAGAGGCTGCTTTCTTTTGA**GGGGTTAGCAGGCGTATAGCCATGC  
**TTGACTACCGTCGGGATCTCCGACGAAAGAAAAC**TCCCAATCGTCCGCATATCGGTACG

r1

TGGATCTCAGTCTATCACTACCCGCTTAATCTTCCACCTTTAG**ATCAACTTGCCAGGCAC**  
 ACCTAGAGTCAGATAGTGATGGGCGAATTAGAAGGTGGAAATC**TAGTTGAACGGTCCGTG**  
 #65

r2' BglII

**CGGCAGCAGTTCGACCAGGTAGCCAAGTTCAGATCT**  
**GCCGTCGTCAAGCTGGTCCATCGGTTCAAGTCTAGA**

**Figure S4.** DNA sequence of *oriV<sub>RA3</sub>*

The partial r3 repetition is indicated in green, AT-rich patch (60%) in blue and r1 of DR2 and part of r2 (to BglII site in italics) are marked in red and purple, respectively. Underlined nucleotides in the repetition r1 differ from the consensus. Primers used for cloning and RT-PCR are indicated. The amino acid sequence of C-terminus of RepB is shown.
