# Supplementary material for: Deciphering the Regulatory Circuits of RA3 Replication Module - Mechanisms of the Copy Number Control
Source: MDPI journal article supplement (doi:10.3390/ijms23179964), 2022-09-01
Supplement: s1 [file s1]

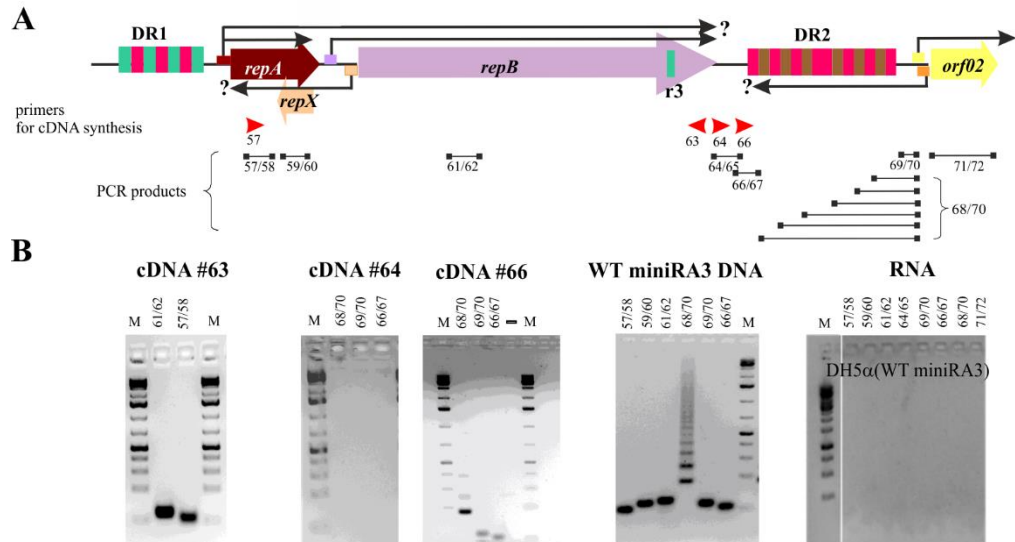

**Figure S5.** RT-PCR analysis of the transcripts of WT miniRA3. on RNA isolated from DH5α(RA3). The upper part **(A)** illustrates the location of primers used for cDNA synthesis (red arrows) and the expected PCR products for various primers pairs as in the Figure 4. **(B)** Photographs document products of PCR using cDNAs obtained in the reverse transcriptase reactions on RNA isolated from *E. coli* strain DH5a (WT miniRA3) with primers #63 (for the *repA-repB* co-expression), primers #66 and #64. (for the extent of the transcript from *orf02p<sub>rev</sub>*). The last two photographs document control reactions of the used pairs of primers on plasmid DNA and purity of RNA samples. M- indicates DNA markers.
