# Supplementary material for: Deciphering the Regulatory Circuits of RA3 Replication Module - Mechanisms of the Copy Number Control
Source: MDPI journal article supplement (doi:10.3390/ijms23179964), 2022-09-01
Supplement: s1 [file s1]

## Fragment 45619-45835:

#7  
 CTACACGAACAGAGCCGGAATACTGGCTAGGGCTGCAAAGTGCCGTGGATCTATGGGACG  
 GATGTGCTTGTCTCGGCCTTATGACCGATCCCGACGTTTCACGGCACCTAGATAACCCTGC  
 a t r t e p e y w l g l q s a v d l w d  
 - v f l a p i s a l a a f h r p d i p r

#18  
 CAGAGAATGACGAGGCGTTGCGTAGTCGTCTAGGACAGGTGAGGCCGTTAGCGGCATAGA  
 GTCTCTTACTGCTCCGCAACGCATCAGCAGATCCTGTCCACTCCGGCAATCGCCGTAATCT  
 a e n d e a l r s r l g q v r p l a a -  
 l s h r p t a y d d l v p s a t l p m

#8                      -35 *repBp*                      -10 *repBp*                      RepX  
 AAGGGAAAACCCCGGAAACCAACTTGGCGGGCGGTTTACCGGGGTCTAAATTGGTGGCA  
 TTCCCTTTTGGGGCCTTGGTTGAACCGCCCGCCAAATGGCCCCAGATTTAAACCACCGT  
 —#2

CTTTCGGTGAGCTTGGCGGCAACCGAGGTGCCGGAGC  
 GAAAGCCACTCGAACCGCCGTTGGCTCCACGGCCTCG

**Figure S2.** DNA sequence of the 3' end of the *repA* gene, *repX* ORF and *repBp*

The top strand encodes the C-terminus of RepA (in red), the bottom strand encodes 38 amino acids polypeptide RepX (in green). The rbs site of *repX*mRNA is underlined. Arms of the palindromic sequence are shadowed in blue, T-rich sequences on both sides of the palindrome are underlined also in blue. Putative *repBp* motifs are in bold. Primers used for cloning of various derivatives are shown.
